# Supplementary material for: The Importance of Cancer Registry Linkage for Studying Rare Cancers in Prospective Cohorts
Source: Hindawi journal article supplement (doi:10.1155/2020/2895276), 2020-11-25
Supplement: f1 [file 2895276.f1.pdf]

## SUPPLEMENTARY TABLES

**Table S1.** SEER 2018 cancer categories based on ICD-O-3 topography, corresponding self-report accuracy type, and combined groupings for reporting purposes.

| ICD_0-3 (Cxxx) Topography                           | SEER 2018 Cancer Type(ref)                | Self-report Accuracy Type                 | Combined Groups              |                      |
|-----------------------------------------------------|-------------------------------------------|-------------------------------------------|------------------------------|----------------------|
| C000-C006, C008-C009                                | Lip                                       | Lip                                       | Oral/<br>Respiratory         |                      |
| C019-C024, C028-C029                                | Tongue                                    | Tongue                                    |                              |                      |
| C030-C031, C039-C041,C048-C052,C058-C062, C068-C069 | Gum, Floor of Mouth, & Other Mouth        | Gum, Floor of Mouth, & Other Mouth        |                              |                      |
| C079-C081,C088-C089                                 | Salivary Gland                            | Salivary Gland                            |                              |                      |
| C090-C091,C098-C104,C108-C109                       | Oropharynx                                | Throat                                    |                              |                      |
| C110-C113,C118-C119                                 | Nasopharynx                               |                                           |                              |                      |
| C129-C132,C138-C139                                 | Hypopharynx                               |                                           |                              |                      |
| C140,C142,C148                                      | Pharynx                                   |                                           |                              |                      |
| C150-C155,C158-C159                                 | Esophagus                                 | Esophagus                                 | Digestive/<br>Hepatic        |                      |
| C160-C166,C168-C169                                 | Stomach                                   | Stomach                                   |                              |                      |
| C170-C173,C178-C179                                 | Small Intestine                           | Small Intestine                           |                              |                      |
| C180, C182-C189, C199                               | Large Intestine                           | Large Intestine                           |                              |                      |
| C181                                                | Appendix                                  | Appendix                                  |                              |                      |
| C209                                                | Rectum                                    | Rectum                                    |                              |                      |
| C210-C212,C218                                      | Anal Canal & Anus                         | Anal Canal & Anus                         |                              |                      |
| C260,C268-C269                                      | Unspecified Digest. Organs                | Unspecified Digest. Organs                |                              |                      |
| C220                                                | Liver                                     | Liver                                     |                              |                      |
| C221                                                | Intrahepatic Bile Duct                    | Intrahepatic Bile Duct                    |                              |                      |
| C239-C241,C248-C249                                 | Gallbladder & Extrahepatic Bile Duct      | Gallbladder & Extrahepatic Bile Duct      |                              |                      |
| C250-C254,C257-C259                                 | Pancreas                                  | Pancreas                                  |                              |                      |
| C300                                                | Nasal Cavity (Including Nasal Cartilage)  | Nasal Cavity (Including Nasal Cartilage)  |                              | Oral/<br>Respiratory |
| C301, C310-C313,C318-C319                           | Accessory, Sinuses, Middle & Inner Ear    | Accessory, Sinuses, Middle & Inner Ear    |                              |                      |
| C320-C323,C328-C329                                 | Larynx                                    | Larynx                                    |                              |                      |
| C339                                                | Trachea                                   | Trachea                                   |                              |                      |
| C340-C343,C348-C349                                 | Lung & Bronchus                           | Lung & Bronchus                           |                              |                      |
| C379                                                | Thymus                                    | Thymus                                    |                              |                      |
| C380                                                | Heart                                     | Heart                                     |                              |                      |
| C381-C383, C388                                     | Mediastinum                               | Mediastinum                               |                              |                      |
| C384                                                | Pleura                                    | Pleura                                    |                              |                      |
| C390,C398-C399                                      | Respiratory, NOS                          | Respiratory, NOS                          |                              |                      |
| C400-C403,C408-C414,C418-C419                       | Bones & Joints                            | Bones & Joints                            | Other                        |                      |
| C420, C421, C424                                    | Blood, Bone Marrow & Hematopoietic System | Blood, Bone Marrow & Hematopoietic System | Blood/<br>Hemato-<br>poietic |                      |
| C422                                                | Spleen                                    | Spleen                                    |                              |                      |
| C423                                                | Reticulo-Endothelial                      | Reticulo-Endothelial                      |                              |                      |
| C440-C449                                           | Skin-US SEER Definition                   | Skin-US SEER Definition                   | Skin                         |                      |
| C470-C476,C478-C479,C490-C496,C498-C499             | Connective & Soft Tissue                  | Connective & Soft Tissue                  | Other                        |                      |

|                                 |                                                        |                                                        |                     |
|---------------------------------|--------------------------------------------------------|--------------------------------------------------------|---------------------|
| C480-C482,C488                  | Retroperitoneum & Peritoneum                           | Retroperitoneum & Peritoneum                           |                     |
| C500-C506,C508-C509             | Breast                                                 | Breast                                                 | Breast              |
| C510-C512,C518, C529            | Vagina & Labia                                         | Vagina & Labia                                         | Female Reproductive |
| C519                            | Vulva, NOS                                             | Vulva, NOS                                             |                     |
| C530-C531,C538-C539             | Cervix Uteri                                           | Cervix Uteri                                           |                     |
| C540-C543,C548-C549             | Corpus Uteri                                           | Uterus/Endometrial                                     |                     |
| C559                            | Uterus, NOS                                            |                                                        |                     |
| C569                            | Ovary                                                  | Ovary                                                  |                     |
| C570-C574,C577-C579             | Other Female Genital                                   | Other Female Genital                                   |                     |
| C589                            | Placenta                                               | Placenta                                               |                     |
| C600-C602,C608-C609, C632       | Penis & Scrotum                                        | Penis & Scrotum                                        |                     |
| C619                            | Prostate Gland                                         | Prostate Gland                                         |                     |
| C620-C621,C629                  | Testis                                                 | Testis                                                 |                     |
| C630, C631, C637-C639           | Epididymis, Spermatic Cord, Male Genital, NOS          | Epididymis, Spermatic Cord, Male Genital, NOS          |                     |
| C649                            | Kidney                                                 | Kidney                                                 | Urinary             |
| C659, C669                      | Renal Pelvis, Ureter                                   | Renal Pelvis, Ureter                                   |                     |
| C670-C679                       | Urinary Bladder                                        | Urinary Bladder                                        |                     |
| C680-C681,C688-C689             | Other Urinary Organs                                   | Other Urinary Organs                                   |                     |
| C690-C691, C693, C695-C698      | Orbit & Lacrimal Gland (Excl. Retina, Eye, NOS)        | Orbit & Lacrimal Gland (Excl. Retina, Eye, NOS)        | CNS/Eye             |
| C692                            | Retina                                                 | Retina                                                 |                     |
| C694                            | Eyeball                                                | Eyeball                                                |                     |
| C699                            | Eye, NOS                                               | Eye, NOS                                               |                     |
| C700-C701,C709                  | Meninges (Cerebral, Spinal)                            | Meninges (Cerebral, Spinal)                            |                     |
| C710-C714, C717-C719, C720-C725 | Brain, Cranial Nerves, & Spinal Cord (Excl. Ventricle, | Brain, Cranial Nerves, & Spinal Cord (Excl. Ventricle, |                     |
| C715                            | Ventricle                                              | Ventricle                                              |                     |
| C716                            | Cerebellum                                             | Cerebellum                                             |                     |
| C728-C729                       | Nervous                                                | Nervous                                                |                     |
| C739                            | Thyroid                                                | Thyroid                                                | Endocrine           |
| C740-C741,C749                  | Adrenal Glands                                         | Adrenal Glands                                         |                     |
| C750                            | Parathyroid                                            | Parathyroid                                            |                     |
| C751                            | Pituitary Gland                                        | Pituitary Gland                                        |                     |
| C753                            | Pineal Gland                                           | Pineal Gland                                           |                     |
| C754-C755,C758-C759             | Other Endocrine Glands                                 | Other Endocrine Glands                                 |                     |
| C760-C768                       | Ill-Defined                                            | Ill-Defined                                            |                     |
| C770-C775,C778-C779             | Lymph Nodes                                            | Lymph Nodes                                            | Lymphatic           |
| C809                            | Unknown                                                | Unknown                                                | Other               |
| --                              | --                                                     | Histology Only, site unclear <sup>a</sup>              |                     |
| --                              | --                                                     | Site Unclear, histology not specified <sup>a</sup>     |                     |
| --                              | --                                                     | Type Missing <sup>b</sup>                              |                     |

SEER= Surveillance, Epidemiology and End Results Program, ICD-O-3=International Classification of Diseases for Oncology, Third Edition

<sup>a</sup> Sites generated for self-reported cancer types that did not fit into a site category, either because they specified histology only or were unclear or too broad.

<sup>b</sup> Site generated for those who self-reported that they were diagnosed with cancer without giving any other information.

**Table S2.** Definition of terms in the analyses of self-reported cancer diagnosis validity.

| Term      | Type of self-report analysis                                                                       |                                                                                                                                                                                       |                                                                                                          |
|-----------|----------------------------------------------------------------------------------------------------|---------------------------------------------------------------------------------------------------------------------------------------------------------------------------------------|----------------------------------------------------------------------------------------------------------|
|           | Overall diagnosis (any cancer)                                                                     | Cancer diagnosis stratified by common or rare (Y= 1 common, 0 rare) <sup>a</sup>                                                                                                      | Site-specific cancer diagnosis (X=SEER cancer category) <sup>b</sup>                                     |
| <b>TP</b> | Self-reported cancer in an ATP follow-up survey and had a diagnosis of cancer in the ACR           | Self-reported cancer Y in an ATP follow-up survey and had a diagnosis of cancer Y in the ACR                                                                                          | Self-reported cancer site X in an ATP follow-up survey and had a diagnosis of cancer X in the ACR        |
| <b>TN</b> | Did not report cancer in an ATP follow-up survey and did not have a diagnosis of cancer in the ACR | Did not report cancer Y in an ATP follow-up survey and did not have a record of cancer Y in the ACR                                                                                   | Did not report cancer site X in an ATP follow-up survey and did not have a record of cancer X in the ACR |
| <b>FP</b> | Self-reported cancer in an ATP follow-up survey, but did not have a diagnosis of cancer in the ACR | Self-reported cancer Y in an ATP follow-up survey but did not have a record of cancer Y in the ACR (e.g. Self-reported a common cancer but ACR has a rare cancer or no cancer record) | Self-reported cancer site X in an ATP follow-up survey but did not have a record of cancer X in the ACR  |
| <b>FN</b> | Did not report a cancer diagnosis in ATP follow-up, but had a diagnosis of cancer in the ACR       | Did not report cancer Y in ATP follow-up, but had a record of cancer type Y in the ACR (e.g. no self-report of cancer or a report of common cancer, but ACR has a rare cancer)        | Did not report cancer site X in ATP follow-up, but had a record of cancer X in the ACR                   |

TP=True Positive, TN=True Negative, FP=False Positive, FN=False Negative

<sup>a</sup> Common or rare cancer types defined as those cancer types with an incidence rate of <15/100,000 person-years, as per Walker et al. (2020)<sup>1</sup>.

<sup>b</sup> SEER=Surveillance, Epidemiology, and End Results. Description of categories in Table S1.
